# Supplementary material for: Racial and Ethnic Disparities in Adult Obesity Across Food and Physical Activity Environments in the United States: A Multilevel Analysis
Source: Research Square preprint supplement (doi:10.21203/rs.3.rs-8041950/v1), 2025-11-20
Supplement: Supplementary file 2 [file 27230b62bda9bc10fc1ea943.docx]

**Supplementary Information:**

**Additional file 1: Multilevel interaction model results (STATA commands and outputs)**

**For American Indians’ Alaskan native: AIAN**

**Step1 :Generate interaction variables**

gen AIANxGROCg16 = PCT_AIANg23 * GROCg16

gen AIANxFFRg16 = PCT_AIANg23 * FFRg16

gen AIANxCONVSg16 = PCT_AIANg23 * CONVSg16

gen AIANxSUPERCg16 = PCT_AIANg23 * SUPERCg16

gen AIANxPCT_LACCESS_LOWIg15 = PCT_AIANg23 * PCT_LACCESS_LOWIg15

**Step 2: Run the multilevel mixed model**


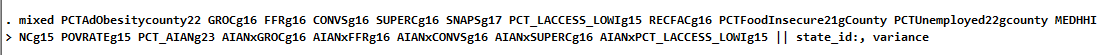


**Key results for AIAN and interaction terms:**

*Table S1.* AIAN interaction terms

| VARIABLE/INTERACTION TERM | COEFFICIENT | P-VALUE | INTERPRETATION |
| --- | --- | --- | --- |
| % American Indian/Alaskan Native  (PCT_AIANg23) | 0.0254 | 0.004 | A 1 percentage point increase in the American Indian/Alaska Native (AIAN) population is associated with a 0.0254 percentage point increase in adult obesity rates. This is a statistically significant and positive main effect. |
| | **Grocery Store**  **(GROCg16)** | | --- |  |  | | --- | | | -0.0081 | | --- | | | 0.0001 | | --- | | | A 1-unit increase in grocery store count is associated with a 0.0081 percentage point decrease in obesity. Significant negative effect. | | --- | |
| | **Fast-Food Restaurant Count** | | --- |  |  | | --- |   (FFRg16) | | 0.0061 | | --- | | 0.0001 | A 1-unit increase in fast-food restaurant count is associated with a 0.0061 percentage point increase in obesity. Significant positive association. |
| | **Convenience Store Count** | | --- | | **(CONVSg16)** |  |  | | --- | | | **0.0088** | | --- | | 0.0001 | A 1-unit increase in convenience store count is associated with a 0.0088 percentage point increase in obesity. Significant positive effect. |
| | **Supercenter/Club Store Count**  **(SUPERCg16)** | | --- | | | -0.0053 | | --- | | | 0.002 | | --- | | | A 1-unit increase in supercenter count is associated with a 0.0053 percentage point decrease in obesity. Significant negative effect. | | --- | |
| | **% Low-Income, Low Access to Stores**  **(PCT_LACCESS_LOWIg15)** | | --- |  |  | | --- | | | **0.0169** | | --- | | 0.0001 | A 1 percentage point increase in low-access, low-income households is associated with a 0.0169 percentage point increase in obesity. Statistically significant positive effect. |
| %American Indian/Alaska Native x Grocery store  (AIANxGROCg16) | 0.0004 | 0.588 | Not significant. No differential effect of grocery store access in AIAN counties. |
| %American Indian/Alaska Native x Fast-food restaurants  (AIANxFFRg16) | -0.0003 | 0.949 | Not significant. No differential effect of fast food density. |
| %American Indian/Alaska Native x Convenience store  (AIANxCONVSg16) | 0.0004 | 0.584 | Not significant. No differential effect of convenience store density. |
| %American Indian/Alaska Native x Supercenter  (AIANxSUPERCg16) | -0.0006 | 0.420 | Not significant. Suggests slightly lower effect of supercenters on obesity in AIAN counties, but not statistically supported. |
| %American Indian/Alaska Native x % Low access to store Low income  (AIANxPCT_LACCESS_LOWIg15) | -0.0007 | 0.110 | Not statistically significant, but directionally negative—suggesting the impact of low access on obesity may be weaker in AIAN-predominant counties. |

Additional STATA output files are available upon request.

**For Asian**

**Step1 :Generate interaction variables**

gen ASIANxGROCg16 = PCT_ASg23 * GROCg16

gen ASIANxFFRg16 = PCT_ASg23 * FFRg16

gen ASIANxCONVSg16 = PCT_ASg23 * CONVSg16

gen ASIANxSUPERCg16 = PCT_ASg23 * SUPERCg16

gen ASIANxPCT_LACCESS_LOWIg15 = PCT_ASg23 * PCT_LACCESS_LOWIg15

**Step 2: Run the multilevel mixed model**

**Food environment interactions (ASIAN × food environment):**

*Table S2.* Asian interaction terms

| VARIABLE / INTERACTION TERM | COEFFICIENT | P-VALUE | INTERPRETATION |
| --- | --- | --- | --- |
| % Asian  (PCT_ASg23) | -0.168 | 0.0001 | A 1 percentage point increase in the Asian population is associated with a 0.168 percentage point decrease in adult obesity rates. This is a statistically significant and negative main effect, consistent with national trends of lower obesity prevalence among Asian populations. |
| | **Grocery Store** | | --- | | **(GROCg16 )** |  |  | | --- | | | -0.0078 | | --- | | | 0.075 | | --- | | Marginally significant; greater grocery store density is associated with slightly lower adult obesity rates. |
| Fast-food restaurants  (FFRg16) | 0.0038 | 0.0009 | Significant positive: More fast-food restaurants linked to higher obesity. |
| Supercenters/club stores  (SUPERCg16) | -0.0176 | 0.003 | Significant negative: More supercenters linked to lower obesity. |
| Convenience stores  (CONVSg16) | 0.0019 | 0.138 | Not significant: Convenience store count not significantly associated. |
| Low access to stores, Low Income  (PCT_LACCESS_LOWIg15) | 0.0151 | 0.009 | Significant positive: Greater low access linked to higher obesity. |
| % Asian x Grocery store  (ASIANxGROCg16) | -0.0004 | 0.379 | Not significant |
| % Asian x Fast-food Restaurant  (ASIANxFFRg16) | -0.0003 | 0.147 | Not significant |
| % Asian x Convenience store  (ASIANxCONVSg16) | -0.0004 | 0.121 | Not significant |
| % Asian x Supercenter  (ASIANxSUPERCg16) | -0.0002 | 0.826 | Not significant |
| % Asian x % Low access to stores and Low income  (ASIANxPCT_LACCESS_LOWIg15) | 0.0027 | 0.280 | Not significant |

**For Hispanics**

**Step1 :Generate interaction variables**

gen HGxGROC = PCT_Hg23 * GROCg16

gen HGxFFR = PCT_Hg23 * FFRg16

gen HGxCONVS = PCT_Hg23 * CONVSg16

gen HGxSUPERC = PCT_Hg23 * SUPERCg16

gen HGxACCESS = PCT_Hg23 * PCT_LACCESS_LOWIg15

**Step 2: Run the Multilevel Mixed Model**

**Interaction terms (Hispanic × food environment):**

*Table S3.* Hispanic interaction terms

| VARIABLE/INTERACTION TERM | COEFFICIENT | P-VALUE | INTERPRETATION |
| --- | --- | --- | --- |
| Percent Hispanic  (PCT_Hg23) | 0.045 | 0.0001 | A 1 percentage point increase in the Hispanic population is associated with a 0.045 percentage point increase in adult obesity rates. This is a statistically significant and positive main effect. |
| | **Grocery Stores** | | --- | | **(GROCg16)** |  |  | | --- | | | -0.0058 | | --- | | | 0.0001 | | --- | | A 1-unit increase in grocery store density is significantly associated with a 0.0058 percentage point decrease in obesity rates. |
| | **Fast Food Restaurants** | | --- | | **(FFRg16)** | | | -0.0043 | | --- | | | 0.0001 | | --- | | Significant negative main effect — more fast food restaurants associated with slightly lower obesity, contrary to expectations. |
| | **Supercenters** | | --- | | **(SUPERCg16)** |  |  | | --- | | -0.0106 | | 0.092 | | --- | | Marginally significant; suggests a weak negative association between supercenter access and obesity. |
| | **Convenience stores** | | --- | | **(CONVSg16)** | | | 0.0018 | | --- | | | 0.032 | | --- | | A 1-unit increase in convenience store density is associated with a small but statistically significant increase in obesity rates. |
| | **Low Access Low income** | | --- | | **(PCT_LACCESS_LOWIg15)** |  |  | | --- | | | 0.0130 | | --- | | | 0.001 | | --- | | Significant positive effect — more low-access households linked to higher obesity. |
| %Hispanic x Grocery  (HGxGROC) | -0.0001 | 0.177 | Not significant — suggests no modifying effect of grocery store density on obesity among Hispanic populations. |
| %Hispanic x Fast food restaurants  (HGxFFR) | 0.0014 | 0.009 | **Significant positive** — in counties with higher Hispanic populations, fast food density has a stronger positive association with obesity. Supports H7. |
| %Hispanic x Convenience stores  (HGxCONVS) | 0.0002 | 0.246 | Not significant — convenience store density does not significantly interact with Hispanic % to affect obesity. |
| %Hispanic x Supercenters  (HGxSUPERC) | -0.0017 | 0.436 | Not significant. |
| %Hispanic x Low access store, Low income  (HGxACCESS) | -0.0002 | 0.820 | Not significant — limited store access does not differentially affect obesity in counties with higher Hispanic composition. |

**Native Hawaiian Pacific Islanders**

**Step1: Generate interaction variables**

gen NHPIxGROC = PCT_NHPIg23 * GROCg16

gen NHPIxFFR = PCT_NHPIg23 * FFRg16

gen NHPIxCONVS = PCT_NHPIg23 * CONVSg16

gen NHPIxSUPERC = PCT_NHPIg23 * SUPERCg16

gen NHPIxACCESS = PCT_NHPIg23 * PCT_LACCESS_LOWIg15

**Step 2: Run the Multilevel Mixed Model**

mixed PCTAdObesitycounty22 GROCg16 FFRg16 CONVSg16 SUPERCg16 SNAPSg17 PCT_LACCESS_LOWIg15 PCT_NHPIg23 NHPIxGROC NHPIxFFR NHPIxCONVS NHPIxSUPERC NHPIxACCESS RECFACg16 PCTFoodInsecure21gCounty PCTUnemployed22gcounty MEDHHINCg15 POVRATEg15 || state_id:, variance

**INTERACTION TERMS**

(Native Hawaiian Pacific Islanders × food environment):

*Table S4.* NHPI interaction terms

| VARIABLE | COEFFICIENT | P-VALUE | INTERPRETATION |
| --- | --- | --- | --- |
| Percent Native Hawaiian or Other Pacific Islander  (PCT_NHPIg23) | 0.3399 | 0.025 | A 1 percentage point increase in the NHPI population is significantly associated with a 0.34 percentage point increase in adult obesity. |
| Grocery Stores  (GROCg16) | -0.0081 | < 0.001 | A 1-unit increase in Grocery store density is associated with a 0.0081 percentage point decrease in adult obesity rates. Higher grocery store density linked to lower obesity |
| Fast Food Restaurants  (FFRg16) | -0.0031 | 0.001 | A significant negative association with obesity, contrary to expectations. |
| Supercenters  (SUPERCg16) | -0.0392 | 0.121 | Not statistically significant |
| % Low access to stores, Low income  (PCT_LACCESS_LOWIg15) | 0.0162 | 0.006 | Low access significantly increases obesity. 1percentage point increase in Low access to store increases adult obesity rates by 0.0163 percentage points. |
| % Native Hawaiian Pacific Islander x Grocery store  (NHPIxGROC) | -0.0058 | 0.425 | Not significant |
| % Native Hawaiian Pacific Islander x Fast-food Restaurants  (NHPIxFFR) | -0.002 | 0.746 | Not significant |
| % Native Hawaiian Pacific Islander x Convenience store  (NHPIxCONVS) | 0.0084 | 0.380 | Not significant |
| % Native Hawaiian Pacific Islander x Supercenter  (NHPIxSUPERC) | 0.1029 | 0.043 | Significant positive interaction: more supercenters are associated with higher obesity rates in counties with larger NHPI populations. |
| % Native Hawaiian Pacific Islander x % Low access Low income  (NHPIxACCESS) | -0.0415 | 0.042 | Significant negative interaction: the obesity effect of low food access is weaker in NHPI-predominant counties. |

**Non-Hispanic Black**

**Step 1: Generate interaction variables**

gen NHBxGROC = PCT_NHBg23 * GROCg16

gen NHBxFFR = PCT_NHBg23 * FFRg16

gen NHBxCONVS = PCT_NHBg23 * CONVSg16

gen NHBxSUPERC = PCT_NHBg23 * SUPERCg16

gen NHBxACCESS = PCT_NHBg23 * PCT_LACCESS_LOWIg15

**Step 2: Run the Multilevel Mixed Model**

mixed PCTAdObesitycounty22 GROCg16 FFRg16 CONVSg16 SUPERCg16 SNAPSg17 PCT_LACCESS_LOWIg15 PCT_NHBg23 NHBxGROC NHBxFFR NHBxCONVS NHBxSUPERC NHBxACCESS RECFACg16 PCTFoodInsecure21gCounty PCTUnemployed22gcounty MEDHHINCg15 POVRATEg15 || state_id:, variance

**Interaction terms**

**(Non-Hispanic black × food environment):**

*Table S5.* Non-Hispanic Black (NHB) interaction terms

| VARIABLE/INTERACTION TERM | COEFFICIENT | P-VALUE | INTERPRETATION |
| --- | --- | --- | --- |
| Non-Hispanic Black Population  (PCT_NHBg23) | 0.2104 | 0.0001 | A 1 percentage point increase in the NHB population is significantly associated with a 0.21 percentage point increase in adult obesity prevalence. |
| Fast Food Restaurants  (FFRg16) | 0.0001 | 0.614 | Not significant |
| Convenience Stores  (CONVSg16) | -0.0004 | 0.002 | Statistically significant negative main effect, suggesting a counterintuitive association: higher convenience store density linked to slightly lower obesity rates. |
| Supercenters  (SUPERCg16) | -0.53 | 0.041 | Marginally significant inverse association. More supercenters associated with lower obesity. |
| % Low Access, Low income  (PCT_LACCESS_LOWIg15) | 0.009 | 0.006 | Significant positive effect; limited food access is linked to higher obesity prevalence. |
| % Non-Hispanic Black x Grocery store  (NHBxGROC) | -0.0008 | 0.035 | Significant negative interaction: Grocery store density is more protective in counties with higher NHB populations. |
| % Non-Hispanic Black x Fast-food restaurant  (NHBxFFR) | -0.0004 | 0.614 | Not significant |
| % Non-Hispanic Black x Convenience store  (NHBxCONVS) | -0.0006 | 0.002 | Significant negative interaction: The positive association between convenience store density and obesity is stronger in NHB-majority counties. |
| % Non-Hispanic Black x Supercenter  (NHBxSUPERC) | -0.0027 | 0.032 | Significant negative interaction: Supercenters are more strongly protective against obesity in NHB-majority counties. |
| % Non-Hispanic Black x % Low Access Low income  (NHBxACCESS) | -0.0006 | 0.523 | Not significant |

**Non-Hispanic White:**

**Step 1: Generate Interaction variables**

gen NHWxGROC = PCT_NHWg23 * GROCg16

gen NHWxFFR = PCT_NHWg23 * FFRg16

gen NHWxCONVS = PCT_NHWg23 * CONVSg16

gen NHWxSUPERC = PCT_NHWg23 * SUPERCg16

gen NHWxACCESS = PCT_NHWg23 * PCT_LACCESS_LOWIg15

**Step 2: Run the Multilevel Mixed Model**

mixed PCTAdObesitycounty22 GROCg16 FFRg16 CONVSg16 SUPERCg16 SNAPSg17 PCT_LACCESS_LOWIg15 PCT_NHWg23 NHWxGROC NHWxFFR NHWxCONVS NHWxSUPERC NHWxACCESS RECFACg16 PCTFoodInsecure21gCounty PCTUnemployed22gcounty MEDHHINCg15 POVRATEg15 || state_id:, variance

**Interaction terms**

**(Non-Hispanic White × Food Environment):**

*Table S6.* Non-Hispanic White (NHW) interaction terms

| VARIABLE/INTERACTION TERM | COEFFICIENT | P-VALUE | INTERPRETATION |
| --- | --- | --- | --- |
| Non-Hispanic White Population  (PCT_NHWg23) | -0.0685 | 0.0001 | A 1 percentage point increase in the NHW population is significantly associated with a 0.0685 percentage point decrease in adult obesity rates. |
| | **Grocery Store** | | --- | | **(GROCg16)** |  |  | | --- | | | -0.0085 | | --- | | | 0.0001 | | --- | | A 1-unit increase in grocery store density is significantly associated with a 0.0085 percentage point decrease in adult obesity rates. |
| | **Fast Food Restaurants** | | --- | | **(FFRg16)** |  |  | | --- | | | 0.0012 | | --- | | | 0.009 | | --- | | A 1-unit increase in fast food restaurant density is significantly associated with a 0.0012 percentage point increase in obesity rates. |
| | **Supercenters** | | --- | | **(SUPERCg16)** | | | -0.0036 | | --- | | | 0.27 | | --- | | Not statistically significant. Slight negative association |
| | **Convenience Stores** | | --- | | **(CONVSg16)** |  |  | | --- | | | 0.0028 | | --- | | 0.0001 | A 1-unit increase in convenience store density is significantly associated with a 0.0028 percentage point increase in obesity. |
| | **Low Access, Low income**  **(PCT_LACCESS_LOWIg15)** | | --- | | | 0.0149 | | --- | | 0.0001 | | A 1 percentage point increase in low-access households is significantly associated with a 0.0149 percentage point increase in obesity. | | --- | |
| % Non-Hispanic White x Grocery store  (NHWxGROC) | 0.0001 | 0.064 | Not significant |
| % Non-Hispanic White x Fast-food Restaurant  (NHWxFFR) | 0.00009 | 0.015 | Not significant |
| % Non-Hispanic White x Convenience store  (NHWxCONVS) | -0.0002 | 0.019 | Statistically significant; convenience store access appears more protective in NHW-majority counties. |
| % Non-Hispanic White x Supercenter  (NHWxSUPERC) | -0.0004 | 0.783 | Not significant |
| % Non-Hispanic White x % low access to stores and low income  (NHWxACCESS) | **-0.0002** | **0.44** | **Not significant** |
