# Supplementary material for: Racial and Ethnic Disparities in Adult Obesity Across Food and Physical Activity Environments in the United States: A Multilevel Analysis
Source: Research Square preprint supplement (doi:10.21203/rs.3.rs-8041950/v1), 2025-11-20
Supplement: Supplementary file 3 [file f02210338e4d3fd05dcdb444.docx]

# **Supplementary Information:**

# **Additional file 2: State-level coefficient plots (race × adult obesity prevalence)**

# **Coefficient plots for race vs adult obesity rates.**

Each plot presents state-level estimates of the association between food insecurity and adult obesity. Dots represent the effect estimates, horizontal bars denote the 95% confidence intervals, and the dashed vertical line at zero reflects the null value.

*Figure S1.* Effect of percent Hispanic population on adult obesity by state

PCT_Hg23 (Hispanic)

Coefficient plot shows the association between the percentage of Hispanic population (PCT_Hg23) and adult obesity rates. There is no association across most states ( with coefficients near zero). A higher percentage of Hispanic population may be linked to lower adult obesity rates, for a few states that show a negative association.
Wide confidence intervals in some states reflect issues like smaller sample sizes or measurement challenges in this population. These findings point to the complex, context-specific nature of race/ethnicity and obesity environments.

*Figure S2.* Effect of percent Non-Hispanic White population on adult obesity by state PCT_NHWg23 (NON-HISPANIC WHITE)


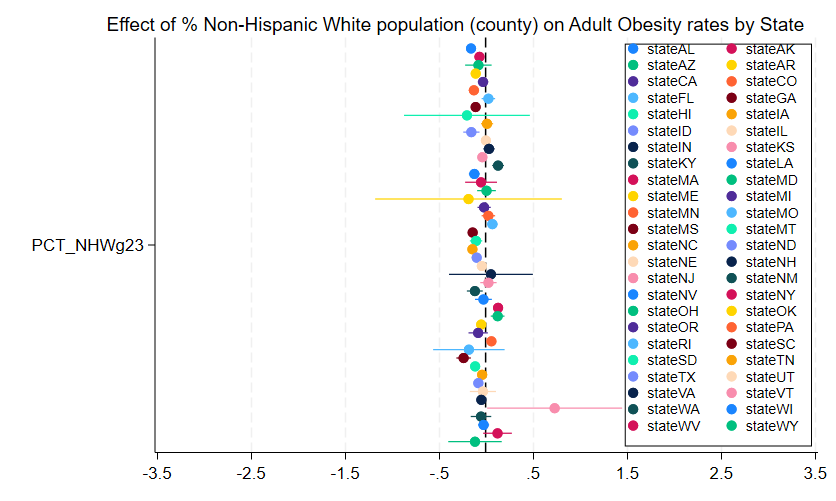


The plot shows the association of percentage of Non-Hispanic White (NHW) population and adult obesity rates in all states. The negative associations in many states indicate that a higher percentage of Non-Hispanic White (NHW) are associated with lower adult obesity rates. Most of the confidence intervals cross zero and hence are not statistically significant.
These differences could be due differences in socioeconomic conditions, resource acces that are better in white neighborhoods. The findings indicate that racial composition alone does not fully explain obesity rates and should be considered together with broader social and environmental factors.

*Figure S3.* Effect of percent Non-Hispanic Black population on adult obesity by state

PCT_NHBg23 (Non-Hispanic Black)


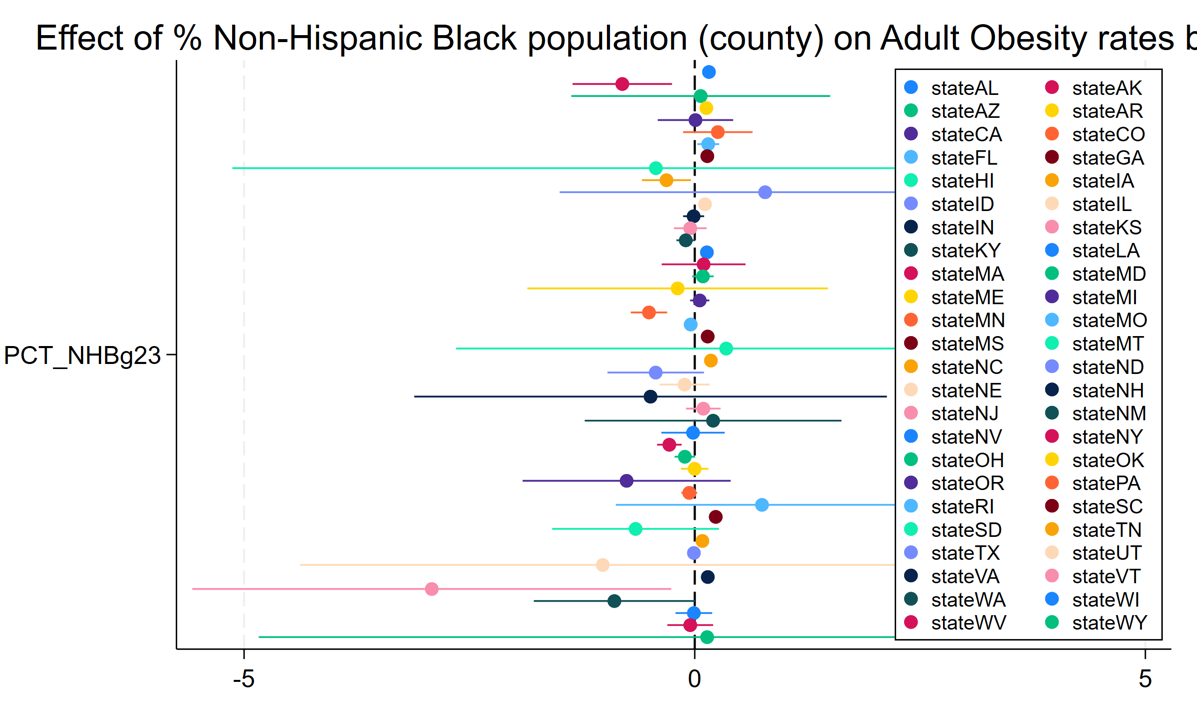


The coefficient plot shows the association of percentage of Non-Hispanic Black (NHB) population and adult obesity rates. A slightly positive association in many states indicate higher percentage of Non- Hispanic Black (NHB) populations are associated with higher adult obesity rates. The wide confidence interval crossing zero, show the effects to be statistically non-significant in many states. The differences in direction and magnitude across states suggests an interplay of other structural and contextual factors including disparities in access to healthcare, healthy food, and even historical inequities in the food and built environments.

*Figure S4.* Effect of percent American Indian or Alaska Native (AIAN) population on adult obesity by state


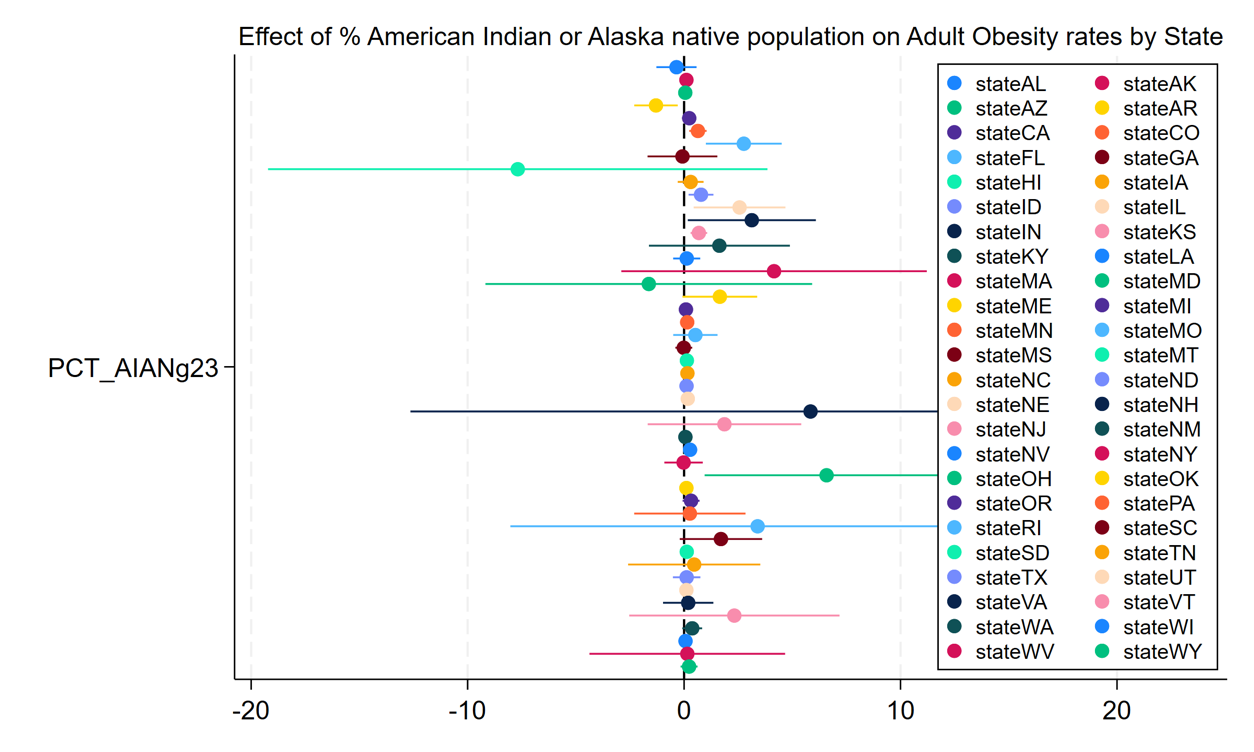


This coefficient plot depicts associations between the percentage of American Indian/Alaska Native (AIAN) population and adult obesity prevalence. Most coefficients show non-significant associations with majority of confidence intervals crossing the zero line. A few states do show positive associations that are imprecise. The results show wide differences across states emphasizing the need to consider structural and geographic factors when interpreting obesity disparities in this race.

*Figure S5.* Effect of percent Asian population on adult obesity by state


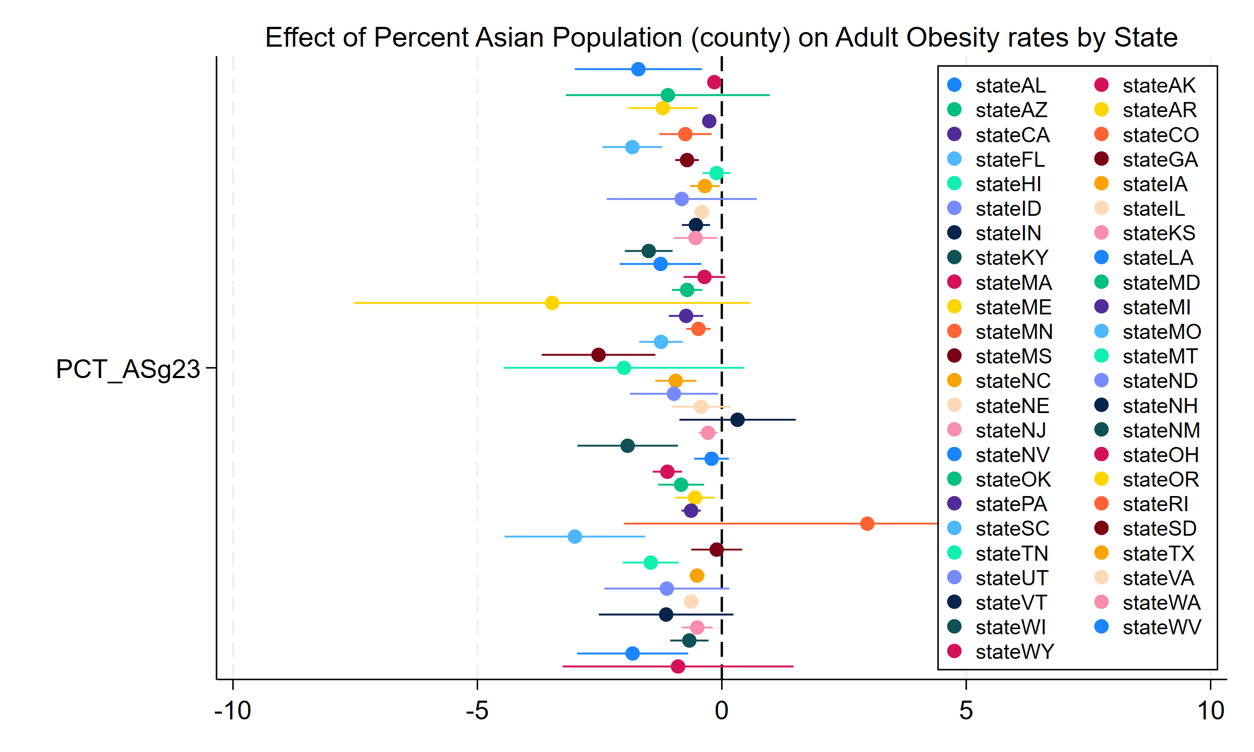


The coefficient plot shows the association between the percentage of Asian population and adult obesity prevalence. Most coefficients show a negative association.

Some states show statistically significant negative associations, as indicated by confidence intervals that do not cross zero. These findings align with national trends of lower obesity rates among Asian populations.

*Figure S6.* Effect of percent Native Hawaiian or Pacific Islander (NHPI) population on adult obesity by state


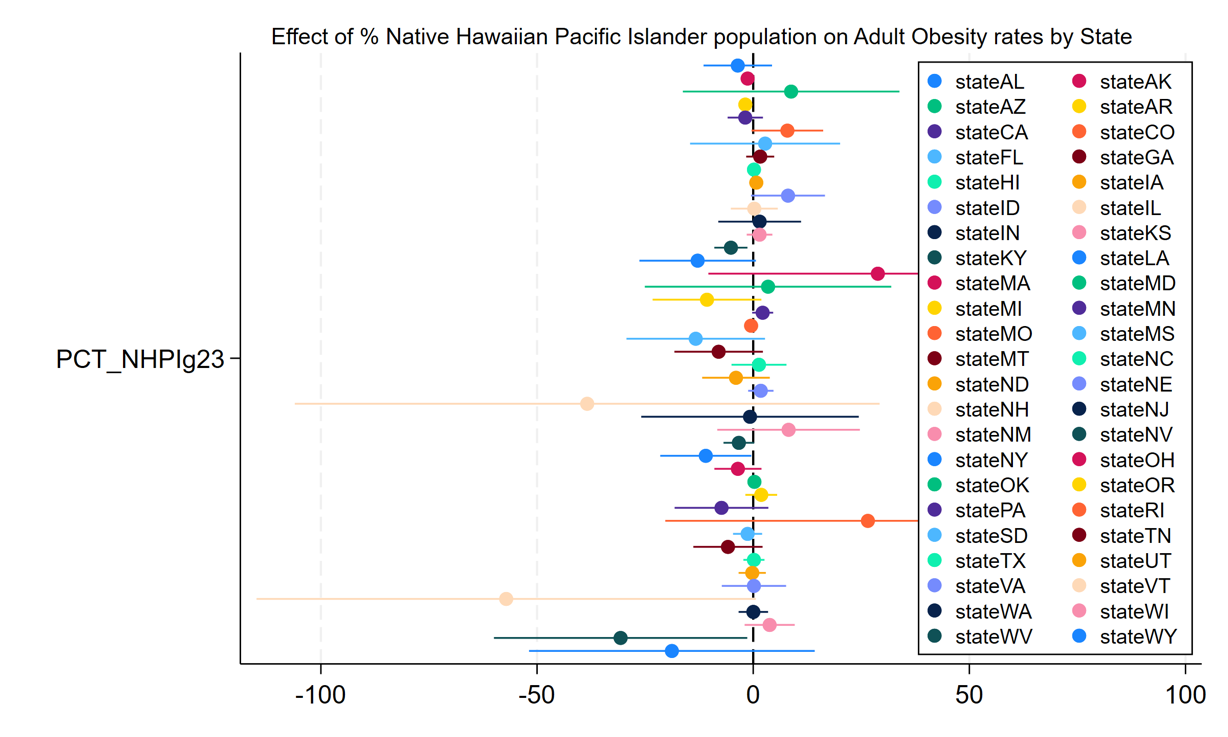


The coefficient plot shows association between the percentage of Native Hawaiian and Pacific Islander (NHPI) population and adult obesity prevalence. Large variations are seen across states. The confidence intervals are wide and cross zero, this indicates non-significant results. The differences highlight the need for more research in regions with larger NHPI populations.

***Figure S7.* Association between county-level poverty rate and adult obesity by state**
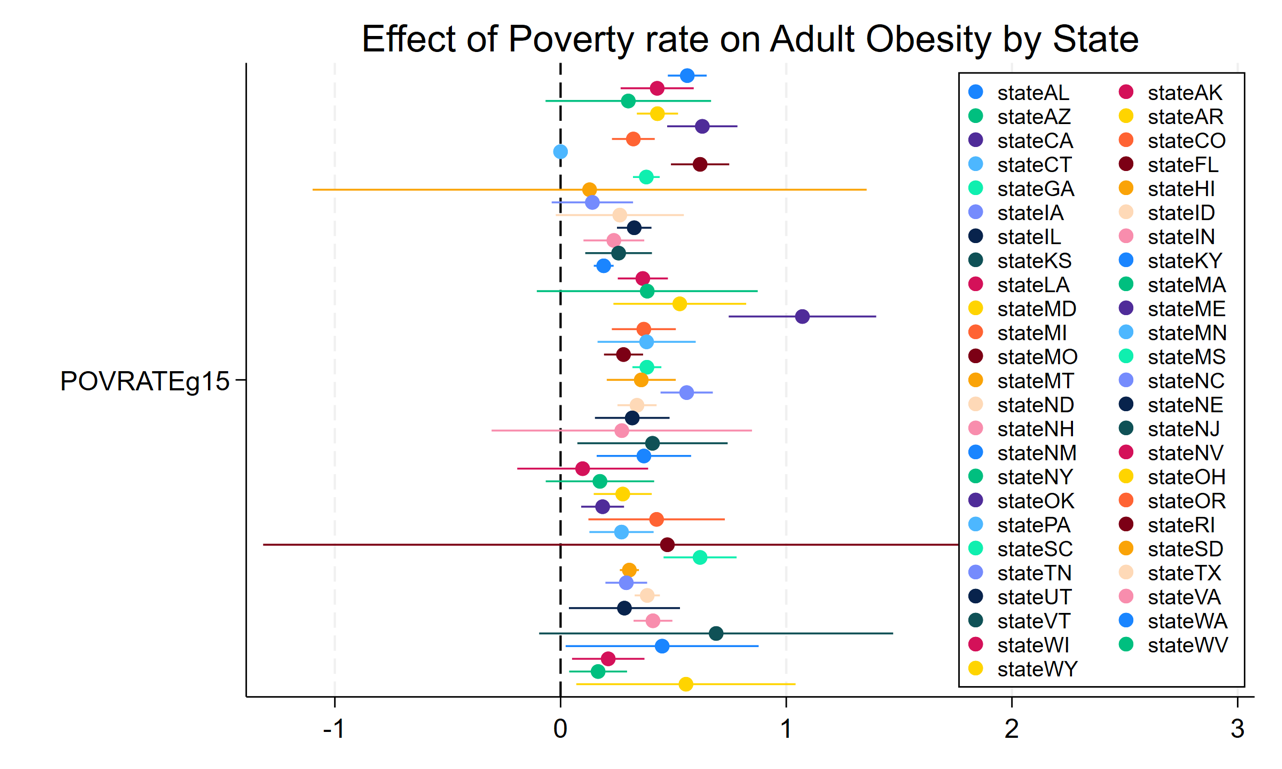


The coefficient plot depicts the association between poverty rates and adult obesity across states. Many states show positive and statistically significant associations, indicating that higher poverty rate is associated with higher obesity prevalence. Few states show weak, non-significant associations. Results reinforce the importance of addressing poverty-related barriers to healthy food and physical activity environments.
